# Supplementary material for: Mutation Spectrum of Six Genes in Chinese Phenylketonuria Patients Obtained through Next-Generation Sequencing
Source: PLoS One. 2014 Apr 4;9(4):e94100. doi: 10.1371/journal.pone.0094100 (PMC3976377; doi:10.1371/journal.pone.0094100)
Supplement: Table S2 — Overview of PGM sequencing performance in all samples. (XLSX) [file pone.0094100.s007.xlsx]

## Sheet: core
Table S2 Overview of PGM sequencing performance in all samples.
ID	sample name	Clean reads	mapped reads	unique reads	unique ratio(%)	Coverage of amplicons(%)	Mean depth of amplicons	Coverage of exons(%)	Mean depth of exons	Family
1	PKUB120036	58912	34103	33904	99.4165	93.27	378.498	95.0978	415.242	core Family
2	PKUB120037	102443	62342	61836	99.1883	95.8621	646.023	97.5086	722.691
3	PKUB120038	26448	16132	16037	99.4111	92.5518	177.995	93.6151	207.984
4	PKUB120039	89979	52361	52027	99.3621	93.9881	573.47	96.1973	620.078
5	PKUB120040	97552	52966	52589	99.2882	94.4327	574.859	96.3183	585.165
6	PKUB120041	57916	33775	33517	99.2361	93.8376	378.059	95.7131	410.426
7	PKUB120042	14918	12009	11839	98.5844	90.3085	131.551	91.7692	145.278
8	PKUB120044	9934	8050	7930	98.5093	91.5738	91.0577	92.7779	96.8249
9	PKUB120045	11697	9543	9422	98.7321	83.64	106.735	87.3815	119.474
10	PKUB120052	35169	27017	26657	98.6675	95.6159	299.72	96.1166	333.454
11	PKUB120053	32319	24557	24228	98.6603	93.0716	279.249	92.9191	296.14
12	PKUB120054	30069	23555	23227	98.6075	94.0428	257.425	94.5229	275.573
13	PKUB130056	31868	24422	24065	98.5382	95.4381	265.217	96.5201	283.219
14	PKUB130057	36083	28022	27601	98.4976	94.5489	306.359	96.2982	329.316
15	PKUB130059	89747	71457	70227	98.2787	95.2808	766.475	96.6008	826.526
16	PKUB130060	85689	65800	65036	98.8389	96.888	711.635	97.0143	727.021
17	PKUB130061	34987	28035	27464	97.9633	97.5104	306.817	97.6901	331.836
18	PKUB130062	43201	34485	34028	98.6748	97.2232	377.481	96.9639	419.09
19	PKUB130063	94622	71063	70072	98.6055	96.2041	775.472	96.4495	832.513
20	PKUB130064	141856	108804	107570	98.8659	96.1494	1146.72	97.0345	1256.57
21	PKUB130069	307432	171606	170466	99.3357	96.5871	1753.45	97.2261	1896.77
22	PKUB130074	18476	13599	13389	98.4558	94.2343	141.51	95.4206	153.767
23	PKUB130075	42175	29197	28755	98.4861	95.2055	299.56	96.0561	316.886
24	PKUB130079	82400	56826	56023	98.5869	96.3067	584.085	95.8846	627.509
25	PKUB130080	17893	12986	12814	98.6755	93.2836	135.833	94.3312	145.183
26	PKUB130083	22806	15455	15240	98.6089	90.2059	163.148	91.8499	177.025
27	PKUB130084	25217	17765	17541	98.7391	91.054	191.389	92.9494	209.972
28	PKUB130085	29455	19738	19517	98.8803	93.2221	208.438	93.373	221.032
29	PKUB130087	55609	36901	36471	98.8347	93.824	390.577	95.4408	405.288
30	PKUB130088	21667	15582	15351	98.5175	92.6065	167.435	93.1108	182.246
31	PKUB130089	31581	22590	22361	98.9863	92.627	243.276	93.6958	270.162
32	PKUB130091	49577	33086	32720	98.8938	89.9802	348.389	92.5963	379.954
33	PKUB130092	91657	61937	61163	98.7503	91.6011	655.329	93.5747	720.538
34	PKUB130094	21886	16068	15734	97.9213	94.3164	170.201	94.5229	182.436
35	PKUB130095	24484	17887	17604	98.4178	93.3794	191.719	95.2895	209.724
36	PKUB130098	65144	47631	46961	98.5934	97.189	500.927	97.7607	521.772
37	PKUB130099	22824	17341	16995	98.0047	96.3682	188.429	96.2578	203.216
38	PKUB130100	31951	24769	24396	98.4941	96.1152	268.758	96.3183	297.346
39	PKUB130101	55975	41280	40560	98.2558	97.2027	437.195	97.4884	480.052
40	PKUB130102	75925	56611	55798	98.5639	93.9744	604.378	94.4926	662.597
41	PKUB130105	193757	123149	122217	99.2432	97.3326	1355.46	97.1152	1483.5
42	PKUB130108	195467	131666	130658	99.2344	96.977	1343.02	97.1757	1499.28
43	PKUB130110	164816	101157	100418	99.2695	97.7567	1083.43	97.3068	1177.79
44	PKUB130111	316650	177009	175798	99.3159	98.6184	1591.58	98.5778	1751.67
45	PKUB130112	280190	166986	165727	99.246	98.7689	1688.17	98.7997	1833.71
46	PKUB130113	151948	96006	95309	99.274	88.8927	1071.23	89.1467	1184.16
47	PKUB130114	281925	190469	189407	99.4424	97.2642	1786.55	96.5806	1956.41
48	PKUB130117	177761	103393	102743	99.3713	88.1061	1197.15	89.883	1288.91
49	PKUB130118	241955	135369	134150	99.0995	98.8031	1331.71	98.6585	1483.03
50	PKUD120001	118332	101353	100174	98.8367	96.4435	1198.63	97.1555	1331.64
51	PKUD120002	185415	157418	155856	99.0077	96.7718	1675.41	96.7117	1731.91
52	PKUD120003	375137	323375	319977	98.9492	97.1069	2851.68	96.7722	3069.49
53	PKUD120004	336129	227836	225181	98.8347	71.9308	348.95	75.8422	392.079
54	PKUD120005	90097	65889	65535	99.4627	85.2472	791.126	87.3109	841.038
55	PKUD120006	84133	62965	62533	99.3139	94.5695	746.65	96.2881	788.209
56	PKUD120012	105805	79862	79353	99.3627	97.743	918.11	97.2867	975.865
57	PKUD120013	232675	168603	166882	98.9793	96.3204	1857.65	95.9048	1962.53
58	PKUD120014	245806	185557	184574	99.4702	90.3632	1696.16	91.5877	1853.3
59	PKUD120015	309775	219533	218397	99.4825	95.9989	2118.5	96.4293	2285.11
60	PKUD120016	153210	111245	110619	99.4373	96.5734	1292.52	96.278	1391.04
61	PKUD120017	261137	194238	193353	99.5444	96.6145	1942.57	96.3486	2045.46
62	PKUD120018	194952	143765	143114	99.5472	98.2491	1574.77	98.0331	1626.17
63	PKUD120019	258431	183914	182801	99.3948	97.7908	1873.04	97.3573	1993.73
64	PKUD120020	40282	28406	28151	99.1023	92.5655	335.322	94.6641	375.751
65	PKUD120021	88155	60611	60272	99.4407	94.3164	710.695	94.5935	759.683
66	PKUD120022	76025	50703	50321	99.2466	92.7228	608.486	93.9379	624.019
67	PKUD120023	121880	80419	79915	99.3733	95.7527	959.242	95.0777	1017.86
68	PKUD120026	69493	51112	50468	98.74	84.6591	616.021	85.8786	650.532
69	PKUD120027	109586	78734	78060	99.144	96.4093	933.129	96.6815	996.246
70	PKUD120028	161488	93863	93044	99.1275	75.1385	1138.61	80.7747	1231.7
71	PKUD120033	186073	129508	128877	99.5128	95.9715	1552.44	95.3298	1678.36
72	PKUD120034	152972	105822	104985	99.209	96.6418	1305.03	96.9639	1373.02
73	PKUD120035	210307	143892	143022	99.3954	97.3942	1708.02	96.7722	1784.52
74	PKUD130055	11985	9482	9305	98.1333	93.4957	103.706	95.0071	117.295
75	PKUD130058	57173	42771	42167	98.5878	97.2642	459.427	97.5994	498.1
76	PKUD130068	237086	135177	134445	99.4585	96.6418	1367.39	97.6599	1475.65
77	PKUD130073	12640	9326	9156	98.1771	95.014	98.5346	95.0676	106.166
78	PKUD130078	49897	35307	34878	98.7849	93.1947	364.886	95.3702	401.718
79	PKUD130082	8420	5971	5881	98.4927	87.1965	64.2946	91.3254	74.0772
80	PKUD130086	36498	26494	26131	98.6299	91.1771	285.822	92.8586	316.56
81	PKUD130093	8532	6497	6344	97.6451	90.5	69.5803	92.4854	80.3682
82	PKUD130096	33688	24261	23882	98.4378	95.2124	256.506	96.742	281.158
83	PKUD130115	191432	110995	110204	99.2874	94.6584	1187.22	94.5128	1336.76
84	PKUB130070	20795	14318	14147	98.8057	93.5572	148.047	95.4408	154.613	Non-core Family
85	PKUB130071	29431	22011	21633	98.2827	93.1195	229.988	94.7751	251.729
86	PKUB130072	40129	27040	26582	98.3062	95.5749	273.136	96.6209	279.244
87	PKUD120009	239460	165470	164378	99.3401	96.8607	1710.47	97.5691	1810.36
88	PKUD120010	96970	75895	75346	99.2766	95.4928	891.981	95.9653	929.89
89	PKUD120024	243010	169351	167835	99.1048	95.951	1859.12	95.7535	1999.37
90	PKUD120025	198093	132780	131550	99.0737	95.4312	1511.87	95.6627	1549.2
91	PKUD120029	159013	110087	109223	99.2152	88.0856	1186.91	89.0861	1234.42
92	PKUD120031	281297	188474	187751	99.6164	94.6584	1977.89	95.4811	2073.05
93	PKUD120032	107716	72992	72550	99.3945	95.1713	876.422	95.0777	945.745
