# Supplementary material for: Mutation Spectrum of Six Genes in Chinese Phenylketonuria Patients Obtained through Next-Generation Sequencing
Source: PLoS One. 2014 Apr 4;9(4):e94100. doi: 10.1371/journal.pone.0094100 (PMC3976377; doi:10.1371/journal.pone.0094100)
Supplement: Table S4 — List of potential variants in 93 samples. (XLSX) [file pone.0094100.s009.xlsx]

## Sheet: Sheet1
Table S4. list of potential variants in 93 samples.
Gene Name	Chrom	Position	Family ID	Patient								Father								Mother								Exon	dbSNP	HGMD/PAHdb	Family
				sample name	Ref	Hom	Genotype	VarFreq	Ref	Var	Depth	sample name	Ref	Hom	Genotype	VarFreq	Ref	Var	Depth	sample name	Ref	Hom	Genotype	VarFreq	Ref	Var	Depth
PAH	chr12	103246707	F1	PKUD120001	C	Hom	T/T	0.9983	8	4571	4579	PKUD120003	C	Het	C/T	0.4613	3454	2959	6413	PKUD120002	C	Het	C/T	0.5274	3442	3845	7287	Exon7	rs62508588	NM_000277.1:c.728T>G	Core/Non-core
PAH	chr12	103234251	F2	PKUD120004	G	Het	G/T	0.4644	542	470	1012	PKUD120006	G	Het	G/T	0.5019	1412	1425	2837	PKUD120005	G	Ref	G/A	0.0004	2253	1	2254	Exon12	rs1801152	-	Core
PAH	chr12	103249009			T	Het	T/C	0.4133	396	279	675		T	Ref	T/T	0	976	0	976		T	Het	T/C	0.4221	678	496	1174	Exon6	rs62514927	NM_000277.1:c.611G>A	Core
PAH	chr12	103234255	F3	PKUD120012	C	Het	C/G	0.4789	2755	2536	5291	PKUD120014	C	Ref	C/T	0.0008	7987	6	7993	PKUD120013	C	Het	C/G	0.4785	3528	3241	6769	Exon12	rs79931499	NM_000277.1:c.1238C>G	Core/Non-core
PAH	chr12	103260385			G	Het	G/C	0.5446	102	122	224		G	Ref	G/C	0.5556	4	5	9		G	Ref	G/G	0	111	0	111	Exon5	rs199475645	NM_000277.1:c.498G>C	Core
PAH	chr12	103311133			C	Het	C/G	0.1099	75	10	85		C	Het	C/G	0.1066	167	21	188		C	Ref	C/A	0.0105	1039	11	1050	Exon1	rs199475594	-	Core
PAH	chr12	103237555	F4	PKUD120015	G	Het	G/T	0.4737	20	18	38	PKUD120017	G	Het	G/T	0.3529	43	24	67	PKUD120016	G	Ref	G/G	0	1012	0	1012	Exon11	rs62516095	NM_000277.1:c.1068G>C	Core/Non-core
PAH	chr12	103246707			C	Het	C/T	0.5123	1170	1231	2401		C	Ref	C/G	0.0009	7662	7	7669		C	Het	C/T	0.432	2149	1636	3785	Exon7	rs62508588	NM_000277.1:c.728T>G	Core/Non-core
PAH	chr12	103246714	F5	PKUD120018	G	Het	G/A	0.1824	2716	606	3322	PKUD120020	G	Ref	G/G	0	586	0	586	PKUD120019	G	Ref	G/A	0.0759	3263	268	3531	Exon7	rs76687508	NM_000277.1:c.721T>C	Core/Non-core
PAH	chr12	103237568	F6	PKUD120021	C	Het	C/T	0.4722	218	195	413	PKUD120023	C	Het	C/T	0.486	54	52	106	PKUD120022	C	Ref	C/C	0	347	0	347	ItSp11_2	rs5030855	NM_000277.1:c.1066-11G>A	Core
PAH	chr12	103238208			A	Het	A/T	0.5536	153	191	344		A	Ref	A/T	0.0038	523	2	525		A	Het	A/T	0.5701	190	252	442	Exon10	-	-	Core
PAH	chr12	103246612	F7	PKUD120026	G	Het	G/T	0.5714	111	148	259	PKUD120028	G	Ref	G/G	0	1	0	1	PKUD120027	G	Ref	G/C	0.0017	1795	3	1798	Exon7	rs62508691	NM_000277.1:c.823C>T	Core
PAH	chr12	103246707	F8	PKUB120036	C	Het	C/T	0.6433	487	880	1367	PKUB120037	C	Het	C/T	0.4934	1151	1123	2274	PKUB120038	C	Ref	C/C	0	181	0	181	Exon7	rs62508588	NM_000277.1:c.728T>G	Core/Non-core
PAH	chr12	103246714			G	Het	G/A	0.3331	956	478	1434		G	Ref	G/G	0	2326	0	2326		G	Het	G/A	0.3636	112	64	176	Exon7	rs76687508	NM_000277.1:c.721T>C	Core/Non-core
PAH	chr12	103238173	F9	PKUB120039	G	Het	G/A	0.4451	100	81	181	PKUB120040	G	Ref	G/G	0	181	0	181	PKUB120041	G	Het	G/A	0.5538	58	72	130	Exon10	rs62516061	NM_000277.1:c.1006T>C	Core
PAH	chr12	103249009			T	Het	T/C	0.4896	368	353	721		T	Het	T/C	0.4564	623	523	1146		T	Ref	T/T	0	470	0	470	Exon6	rs62514927	NM_000277.1:c.611G>A	Core
PAH	chr12	103246707	F10	PKUB120042	C	Het	C/T	0.5167	289	309	598	PKUB120044	C	Ref	C/C	0	228	0	228	PKUB120045	C	Het	C/T	0.4746	206	187	393	Exon7	rs62508588	NM_000277.1:c.728T>G	Core/Non-core
PAH	chr12	103234192	F11	PKUB120052	G	Het	G/T	0.2167	693	192	885	PKUB120053	G	Ref	G/T	0.0019	1042	2	1044	PKUB120054	G	Het	G/T	0.2899	862	363	1225	Exon12	rs199475659	NM_000277.1:c.1301A>C	Core
PAH	chr12	103234255			C	Het	C/G	0.5089	440	456	896		C	Het	C/G	0.4476	568	461	1029		C	Ref	C/T	0.0008	1273	1	1274	Exon12	rs79931499	NM_000277.1:c.1238C>G	Core/Non-core
PAH	chr12	103248921	F12	PKUD130055	G	Het	G/C	0.4452	86	69	155	PKUB130056	G	Ref	G/G	0	413	0	413	PKUB130057	G	Het	G/C	0.3603	87	49	136	Exon6	rs62517208	NM_000277.1:c.699A>C	Core
PAH	chr12	103234255	F13	PKUD130058	C	Het	C/G	0.4841	791	745	1536	PKUB130059	C	Het	C/G	0.4718	2397	2147	4544	PKUB130060	C	Ref	C/T	0.0007	2688	2	2690	Exon12	rs79931499	NM_000277.1:c.1238C>G	Core/Non-core
PAH	chr12	103246714			G	Het	G/A	0.2749	356	135	491		G	Ref	G/G	0	2391	0	2391		G	Het	G/A	0.4288	1125	846	1971	Exon7	rs76687508	NM_000277.1:c.721T>C	Core/Non-core
PAH	chr12	103238134	F14	PKUB130061(p1)	A	Het	A/C	0.5709	120	161	281	PKUB130063	A	Ref	A/C	0.0019	517	1	518	PKUB130064	A	Het	A/C	0.5426	176	210	386	Exon10	rs62508646	NM_000277.1:c.1045G>T	Core
PAH	chr12	103260401			A	Het	A/G	0.5161	256	273	529		A	Het	A/G	0.4945	369	361	730		A	Ref	A/A	0	445	0	445	Exon5	rs79635844	NM_000277.1:c.482C>T	Core
PAH	chr12	103238134		PKUB130062(p2)	A	Het	A/C	0.5052	240	245	485		A	Ref	A/C	0.0019	517	1	518		A	Het	A/C	0.5426	176	210	386	Exon10	rs62508646	NM_000277.1:c.1045G>T	Core
PAH	chr12	103260401			A	Het	A/G	0.5344	210	241	451		A	Het	A/G	0.4945	369	361	730		A	Ref	A/A	0	445	0	445	Exon5	rs79635844	NM_000277.1:c.482C>T	Core
PAH	chr12	103246714	F15	PKUD130068	G	Het	G/A	0.2967	5025	2121	7146	PKUB130105	G	Ref	G/A	0.0005	6619	3	6622	PKUB130069	G	Het	G/A	0.1768	6416	1378	7794	Exon7	rs76687508	NM_000277.1:c.721T>C	Core/Non-core
PAH	chr12	103260442			C	Het	C/T	0.5046	374	383	757		C	Het	C/T	0.5114	278	291	569		C	Ref	C/C	0	193	0	193	ItSp5_2	rs62514907	NM_000277.1:c.442-1G>A	Core
PAH	chr12	103237426	F16	PKUD130073	T	Het	T/A	0.5155	47	50	97	PKUB130074	T	Het	T/A	0.4906	108	104	212	PKUB130075	T	Ref	T/C	0.0022	463	1	464	Exon11	rs199475584	NM_000277.1:c.1197T>A	Core/Non-core
PAH	chr12	103246707	F17	PKUD130078	C	Het	C/T	0.5107	872	910	1782	PKUB130079	C	Ref	C/A	0.0018	2819	5	2824	PKUB130080	C	Het	C/T	0.402	362	244	606	Exon7	rs62508588	NM_000277.1:c.728T>G	Core/Non-core
PAH	chr12	103246708			G	Het	G/A	0.4816	929	864	1793		G	Het	G/A	0.5663	1178	1541	2719		G	Ref	G/A	0.0032	628	2	630	Exon7	rs5030846	NM_000277.1:c.727T>C	Core
PAH	chr12	103245502	F18	PKUD130082(p1)	G	Het	G/A	0.617	18	29	47	PKUB130084	G	Het	G/A	0.6678	96	193	289	PKUB130085	G	Ref	G/G	0	338	0	338	Exon8	-	-	Core
PAH	chr12	103246707			C	Het	C/T	0.4667	80	70	150		C	Ref	C/T	0.0009	1085	1	1086		C	Het	C/T	0.5084	469	485	954	Exon7	rs62508588	NM_000277.1:c.728T>G	Core/Non-core
PAH	chr12	103245502		PKUB130083(p2)	G	Ref	G/G	0	109	0	109	PKUB130084	G	Het	G/A	0.6678	96	193	289		G	Ref	G/G	0	338	0	338	Exon8	-	-	Core
PAH	chr12	103246707			C	Het	C/T	0.525	456	504	960		C	Ref	C/T	0.0009	1085	1	1086		C	Het	C/T	0.5084	469	485	954	Exon7	rs62508588	NM_000277.1:c.728T>G	Core/Non-core
PAH	chr12	103238202	F19	PKUD130086	C	Het	C/T	0.5893	23	33	56	PKUB130087	C	Het	C/T	0.5079	62	64	126	PKUB130088	C	Ref	C/T	0.0135	73	1	74	Exon10	rs62514959	NM_000277.1:c.977A>G	Core
PAH	chr12	103237555	F20	PKUB130089	G	Het	G/T	0.518	281	302	583	PKUB130091	G	Ref	G/T	0.0013	767	1	768	PKUB130092	G	Het	G/T	0.5365	710	824	1534	Exon11	rs62516095	NM_000277.1:c.1068G>C	Core/Non-core
PAH	chr12	103246714			G	Het	G/A	0.3439	395	207	602		G	Het	G/A	0.3455	828	437	1265		G	Ref	G/C	0.0006	3407	2	3409	Exon7	rs76687508	NM_000277.1:c.721T>C	Core/Non-core
PAH	chr12	103234192	F21	PKUD130093	G	Het	G/T	0.2991	74	32	106	PKUB130094	G	Ref	G/T	0.0013	784	1	785	PKUB130095	G	Het	G/T	0.2389	497	162	659	Exon12	rs199475659	NM_000277.1:c.1301A>C	Core
PAH	chr12	103237426			T	Het	T/A	0.5526	17	21	38		T	Het	T/A	0.4932	112	109	221		T	Ref	T/C	0.0036	274	1	275	Exon11	rs199475584	NM_000277.1:c.1197T>A	Core/Non-core
PAH	chr12	103237524			G	Het	G/A	0.1039	69	8	77		G	Ref	G/A	0.0612	721	47	768		G	Het	G/A	0.1188	423	57	480	Exon11	rs62508620	-	Core
PAH	chr12	103237570	F22	PKUD130096	A	Het	A/C	0.5	396	397	793	PKUB130098	A	Ref	A/G	0.001	2035	2	2037	PKUB130099	A	Het	A/C	0.4663	301	263	564	ItSp11_2	-	-	Core
PAH	chr12	103246707			C	Het	C/T	0.5543	201	250	451		C	Het	C/T	0.3745	1160	695	1855		C	Ref	C/T	0.0018	541	1	542	Exon7	rs62508588	NM_000277.1:c.728T>G	Core/Non-core
PAH	chr12	103234271	F23	PKUB130100	G	Het	G/A	0.3068	601	266	867	PKUB130101	G	Het	G/A	0.3292	801	394	1195	PKUB130102	G	Ref	G/A	0.0016	3172	5	3177	Exon12	rs5030858	NM_000277.1:c.1222delC	Core
PAH	chr12	103237426			T	Het	T/A	0.4784	157	144	301		T	Ref	T/T	0	518	0	518		T	Het	T/A	0.3992	309	206	515	Exon11	rs199475584	NM_000277.1:c.1197T>A	Core/Non-core
PAH	chr12	103246592	F24	PKUB130108	C	Het	C/T	0.4571	1453	1226	2679	PKUB130110	C	Ref	C/T	0.001	2094	2	2096	PKUB130111	C	Het	C/T	0.4544	1483	1236	2719	ItSp7_1	rs5030852	NM_000277.1:c.842+1G>A	Core
PAH	chr12	103246602	F25	PKUB130112	G	Het	G/T	0.536	1230	1423	2653	PKUB130113	G	Ref	G/A	0.0015	651	1	652	PKUB130114	G	Het	G/T	0.5095	722	754	1476	Exon7	rs62507262	NM_000277.1:c.833T>C	Core
PAH	chr12	103249009			T	Het	T/C	0.4597	1508	1283	2791		T	Het	T/C	0.4106	556	388	944		T	Ref	T/C	0.0012	2447	3	2450	Exon6	rs62514927	NM_000277.1:c.611G>A	Core
PTS	chr11	112103901	F26	PKUD130115	C	Het	C/T	0.6364	112	196	308	PKUB130117	C	Ref	Nan	Nan	Nan	Nan	Nan	PKUB130118	C	Het	C/T	0.5227	105	115	220	Exon5	rs104894276	NM_000317.2:c.259T>C	Core
PTS	chr11	112103901	F27	PKUD120033	C	Het	C/T	0.5	4	4	8	PKUD120035	C	Het	C/T	0.3889	11	7	18	PKUD120034	C	Ref	C/C	0	11	0	11	Exon5	rs104894276	NM_000317.2:c.259T>C	Core
PTS	chr11	112103914			A	Het	A/G	0.5	4	4	8		A	Ref	A/A	0	18	0	18		A	Het	A/G	0.4545	6	5	11	Exon5	-	-	Core
PAH	chr12	103237426	F28	PKUD120009	T	Het	T/A	0.4859	2689	2541	5230	N/A	-							PKUD120010	T	Ref	T/T	0	2480	0	2480	Exon11	rs199475584	NM_000277.1:c.1197T>A	Core/Non-core
GCH1	chr14	55309858			T	Het	T/A	0.2222	21	6	27		-								T	Ref	T/A	0.1066	109	13	122	Exon6	-	-	Non-core
GCHFR	chr15	41059391			C	Het	C/T	0.1741	983	212	1195		-								C	Ref	C/T	0.1297	161	24	185	Intron2	-	-	Non-core
GCHFR	chr15	41059663			C	Het	C/A	0.3226	84	40	124		-								C	Ref	C/G	0.0463	969	47	1016	Exon3	-	-	Non-core
QDPR	chr4	17488173			T	Het	T/C	0.4516	17	14	31		-								T	Ref	T/C	0.0847	54	5	59	Exon7	-	-	Non-core
PTS	chr11	112097116	F29	PKUD120024	C	Het	C/A	0.5556	4	5	9	PKUD120025	C	Ref	C/T	0.4444	5	4	9	N/A	-							Exon1	-	-	Non-core
PTS	chr11	112097119			C	Het	C/A	0.5556	4	5	9		C	Ref	C/T	0.4444	5	4	9		-							Exon1	-	-	Non-core
PTS	chr11	112097121			C	Het	C/A	0.4444	5	4	9		C	Het	C/T	0.4444	5	4	9		-							Exon1	-	-	Non-core
PTS	chr11	112097122			G	Het	G/C	0.5	4	4	8		G	Ref	G/T	0.0909	10	1	11		-							Exon1	-	-	Non-core
PAH	chr12	103232733			C	Het	C/A	0.1801	127	29	156		C	Ref	C/A	0.0323	210	7	217		-							Exon13	-	-	Non-core
PAH	chr12	103232734			A	Het	A/G	0.2129	111	33	144		A	Ref	A/T	0.0556	204	12	216		-							Exon13	-	-	Non-core
PAH	chr12	103234255			C	Het	C/G	0.4686	4148	3668	7816		C	Het	C/G	0.4767	4081	3728	7809		-							Exon12	rs79931499	NM_000277.1:c.1238C>G	Core/Non-core
PAH	chr12	103246695			C	Het	C/A	0.5181	2853	3073	5926		C	Ref	C/T	0.0008	3987	3	3990		-							Exon7	rs199475579	NM_000277.1:c.740T>G	Non-core
PAH	chr12	103311366			C	Het	C/T	0.1669	605	124	729		C	Het	C/T	0.3077	9	4	13		-							Exon1	-	-	Non-core
PAH	chr12	103311369			T	Het	T/A	0.198	482	119	601		T	Het	T/A	0.3077	9	4	13		-							Exon1	-	-	Non-core
PAH	chr12	103311370			T	Het	T/G	0.1355	732	115	847		T	Het	T/G	0.2667	11	4	15		-							Exon1	-	-	Non-core
GCH1	chr14	55308854			C	Het	C/A	0.1385	56	9	65		C	Ref	C/G	0.5481	61	74	135		-							Exon6	-	-	Non-core
GCHFR	chr15	41059454			C	Het	C/G	0.1162	173	23	196		C	Ref	C/T	0.0438	393	18	411		-							Exon3	-	-	Non-core
GCHFR	chr15	41059763			C	Hom	T	0.9577	3	68	71		C	Ref	C/A	0.0102	97	1	98		-							Exon3	-	-	Non-core
GCHFR	chr15	41059766			C	Hom	A	0.9286	1	13	14		C	Ref	C/C	0	9	0	9		-							Exon3	-	-	Non-core
QDPR	chr4	17488172			A	Het	A/G	0.7788	24	88	112		A	Ref	A/C	0.0319	182	6	188		-							Exon7	-	-	Non-core
QDPR	chr4	17493836			G	Het	G/C	0.1378	1386	222	1608		G	Ref	G/C	0.0488	1733	89	1822		-							ItSp5_1	-	-	Non-core
PCBD1	chr10	72643326	F30	PKUD120029	G	Het	G/A	0.1851	209	52	261	N/A	-							N/A	-							Exon4	-	-	Non-core
PAH	chr12	103232658			T	Het	T/C	0.1273	45	7	52		-								-							Exon13	-	-	Non-core
PAH	chr12	103246707			C	Het	C/T	0.7037	293	696	989		-								-							Exon7	rs62508588	NM_000277.1:c.728T>G	Core/Non-core
PAH	chr12	103246714			G	Het	G/A	0.2698	785	290	1075		-								-							Exon7	rs76687508	NM_000277.1:c.721T>C	Core/Non-core
GCH1	chr14	55308853			T	Het	T/A	0.4118	9	7	16		-								-							Exon6	-	-	Non-core
GCH1	chr14	55308854			C	Het	C/T	0.3889	1	7	8		-								-							Exon6	-	-	Non-core
GCH1	chr14	55308855			C	Het	C/T	0.4211	2	8	10		-								-							Exon6	-	-	Non-core
GCHFR	chr15	41059764			C	Hom	A	1	0	52	52		-								-							Exon3	-	-	Non-core
QDPR	chr4	17488243			C	Het	C/T	0.1852	11	5	16		-								-							Exon7	-	-	Non-core
PCBD1	chr10	72643621	F31	PKUD120031	G	Het	G/A	0.16	84	16	100	N/A	-							PKUD120032	G	Ref	G/G	0	577	0	577	Exon4	-	-	Non-core
PAH	chr12	103237555			G	Het	G/T	0.3333	11	6	17		-								G	Ref	G/G	0	436	0	436	Exon11	rs62516095	NM_000277.1:c.1068G>C	Core/Non-core
QDPR	chr4	17488519			C	Het	C/T	0.1785	1091	237	1328		-								C	Ref	C/A	0.2733	851	320	1171	Exon7	-	-	Non-core
PCBD1	chr10	72644875	F32	PKUB130070(p1)	G	Het	G/C	0.2545	40	14	54	PKUB130071	G	Ref	G/C	0.4505	111	91	202	N/A	-							Intron3	-	-	Non-core
PCBD1	chr10	72644876			C	Het	C/G	0.2907	57	25	82		C	Het	C/G	0.126	105	16	121		-							Intron3	-	-	Non-core
PAH	chr12	103237555			G	Het	G/T	0.5237	221	243	464		G	Het	G/T	0.5191	288	313	601		-							Exon11	rs62516095	NM_000277.1:c.1068G>C	Core/Non-core
PAH	chr12	103246719			C	Het	C/T	0.4019	247	166	413		C	Ref	C/T	0.0011	935	1	936		-							Exon7	rs62507283	NM_000277.1:c.716T>G	Non-core
PAH	chr12	103237555		PKUB130072(p2)	G	Het	G/T	0.4875	573	547	1120	PKUB130071	G	Het	G/T	0.5191	288	313	601		-							Exon11	rs62516095	NM_000277.1:c.1068G>C	Core/Non-core
